# Supplementary material
Source: PubMed Central journal article supplement (PMC7015796)

**Supplemental Figure 1.**

**Inclusion/Exclusion Criteria:**  
**Inclusion:** sufficient neuropsychological and MRI data  
**Exclusion:** (severe) confounding comorbid conditions (Heaton et al., 2010), current substance use disorder, or Frascati (Un)/Meyer (Imp)  
**Total included in analysis:** 241 persons living with HIV

**Neuropsychological Criteria:**  
**Frascati Clinical Ratings (CR):** 1 SD cutoff for “impairment” of each test score; impaired domain based upon number and severity of test scores within domain (focus is on impairment); global “impairment” requires impairment of  $\geq 2$  of 7 ability domains (Woods et al. 2004)  
**Meyer Criteria:** 1.5 SD cutoff on average domain performance for domain “impairment” (good score on 1 test may obscure impairment on another); global “impairment” requires impairment of  $\geq 2$  of 5 domains (Meyer et al., 2013)  
**Global Deficit Scores (GDS) Criteria:** global “impairment” requires, on average, at least mild impairment on at least half of tests in entire battery, with 1 SD cutoff for test score “impairment” (focus is on impairment; Carey et al. 2004)

**Frascati vs. Meyer Groups:**

**GDS vs. Meyer Groups:**

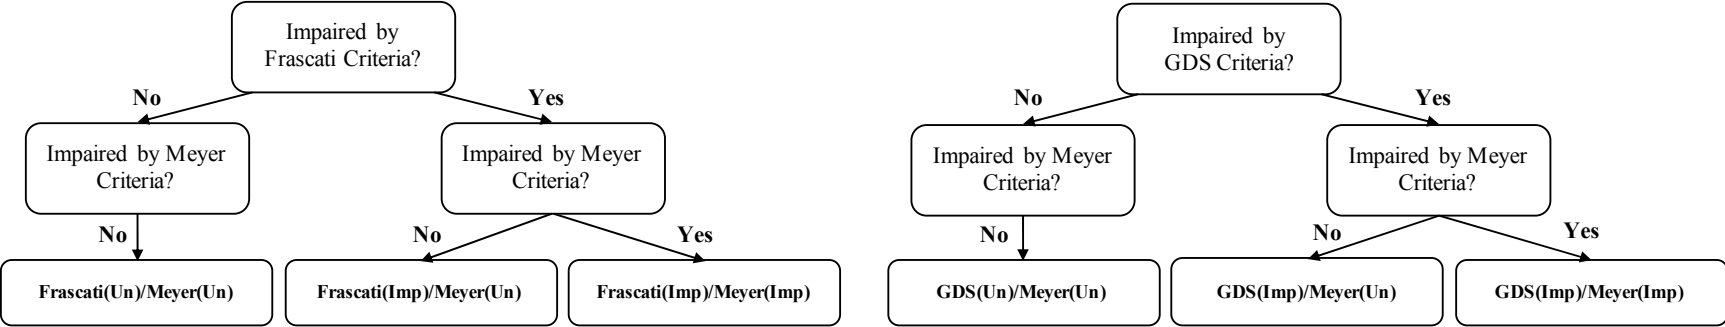

Supplement: NIHMS1537480-supplement-1.pdf [file NIHMS1537480-supplement-1.pdf]
